# Supplementary material for: Exopolysaccharides Isolated from Milk Fermented with Lactic Acid Bacteria Prevent Ultraviolet-Induced Skin Damage in Hairless Mice
Source: Int J Mol Sci. 2017 Jan 13;18(1):146. doi: 10.3390/ijms18010146 (PMC5297779; doi:10.3390/ijms18010146)
Supplement: Supplementary file 1 [file ijms-18-00146-s001.pdf]

# Supplementary Materials: Exopolysaccharides Isolated From Milk Fermented with Lactic Acid Bacteria Prevent Ultraviolet-Induced Skin Damage in Hairless Mice

Masashi Morifuji, Masami Kitade, Tomoyuki Fukasawa, Taketo Yamaji and Masamitsu Ichihashi

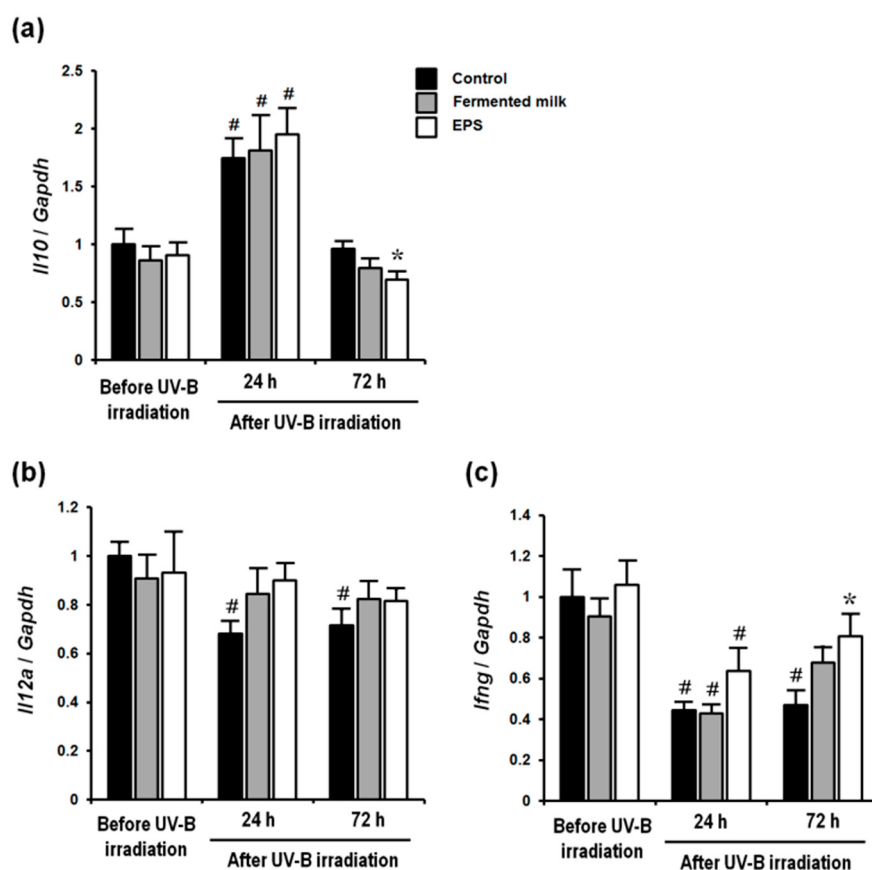

**Figure S1.** Effect of fermented milk and EPS given to hairless mice exposed to UV-B irradiation. Interleukin (IL)-10 mRNA levels (a); IL-12a mRNA levels (b); and interferon- $\gamma$  mRNA levels (c) were measured after a single dose of UV-B irradiation. The values are shown as means + SEM ( $n = 8$ ). \*  $p < 0.05$  (vs. the control group). #  $p < 0.05$  (vs. before UV-B irradiation).
